# Supplementary material for: miRNAsong: a web-based tool for generation and testing of miRNA sponge constructs in silico
Source: PubMed Central journal article supplement (PMC5114684; doi:10.1038/srep36625), 2016-11-18
Supplement: srep36625-s1.pdf [file srep36625-s1.pdf]

## Supplementary information file.

manuscript: miRNAsong: a web-based tool for generation and testing of miRNA sponge constructs *in silico*

Tomáš Bárta<sup>1,2,\*</sup>, Lucie Pešková<sup>2</sup>, and Aleš Hampl<sup>1,2</sup>

<sup>1</sup>International Clinical Research Center, St. Anne's University Hospital Brno, Pekařská 53, 656 91 Brno, Czech Republic

<sup>2</sup>Department of Histology and Embryology, Faculty of Medicine, Masaryk University, Kamenice 3, 625 00 Brno, Czech Republic

\*Corresponding author

## Supplementary Data 1

Sanger sequencing of the vector with cloned miRNA sponge sequences (blue colour). Sequencing primer:  
CACCTGGCCCCGATCTGGCC

tCnncTTtGCCTTTCTCTCcaCAGGTGTCcACTCCCAGGTCCaAGTTTGGTCTAGAGCTAGCCTGTGTACACTGGGGTCCC  
AGGGATTCTTTTAAACTGGACAATTAGGGATTCTTTTAAACTGGACGGGTCCCAGGGATTCTTTTAAACTGGACA  
ATTAGGGATTCTTTTAAACTGGACGGGTCCCCTGGCGGCCGCGCCCTCTCCCTCCCCCCCCCTAACGTTACTGGCC  
GAAGCCGCTTGAATAAGGCCGGTGTGCGTTTGTCTATATGTTATTTCCACCATATTGCCGTCTTTGGCAATGTGA  
GGGCCCCGAAACCTGGCCCTGTCTTCTTGACGAGCATTCTAGGGGTCTTCCCCTCTCGCCAAAGGAATGCAAGGTC  
TGTTGAATGTCGTGAAGGAAGCAGTTCCTCTGGAAGCTTCTTGAAGACAAACAACGTCTGTAGCGACCCTTGCAGG  
CAGCGGAACCCCCACCTGGCGACAGGTGCCTCTGCGGCCAAAAGCCACGTGTATAAGATACACCTGCAAAGGCGG  
CACAACCCAGTGCCACGTTGTGAGTTGGATAGTTGTGGAAAGAGTCAAATGGCTCTCCTCAAGCGTATTCAACAAG  
GGGCTGAAGGAtGCCCAgAAGGTACCCATTGTATGGGATCTGATCTGGgGCCTCnGTGCacaTGChTTtnCaTGtGTTT  
AntCnAngntnnanAAAACgTCTangCCCcccgaa

## Supplementary Figure S1

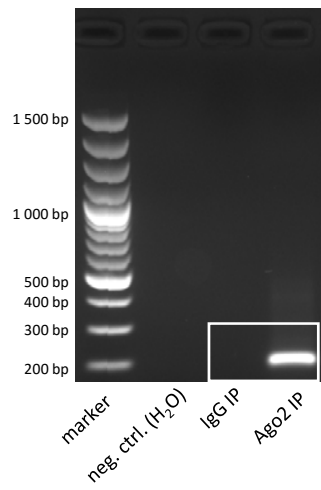

**Supplementary Figure 1:** Quantification of sponge transcript levels in Ago2-immunoprecipitated (Ago2 IP) and control IgG (IgG IP) fractions, as demonstrated by RT-qPCR. Full-scan of gel presented in the Figure 2B with molecular weight marker indicated. White rectangle shows cropped area used in the Figure 2B.

# Supplementary Figure S2

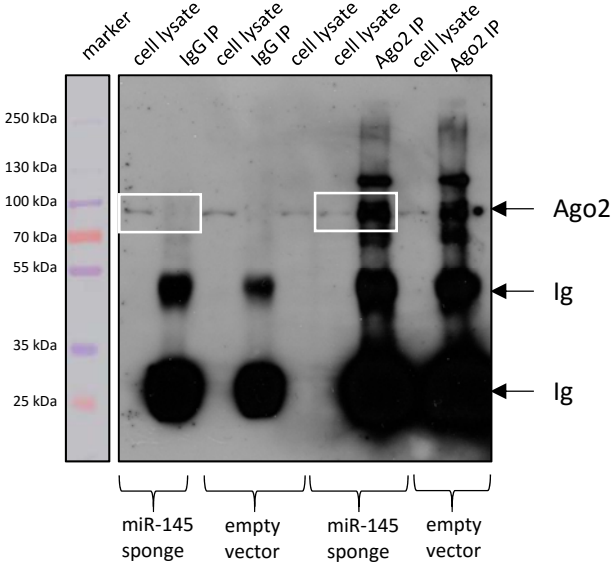

**Supplementary Figure 2:** Western blot analysis of Ago2 levels in Ago2 IP and control IgG IP fractions. Full-scan of blot presented in the Figure 2C with molecular weight marker indicated. Corresponding fragments of blot (white rectangles) used in the Figure 2C are indicated.

# Supplementary Figure S3

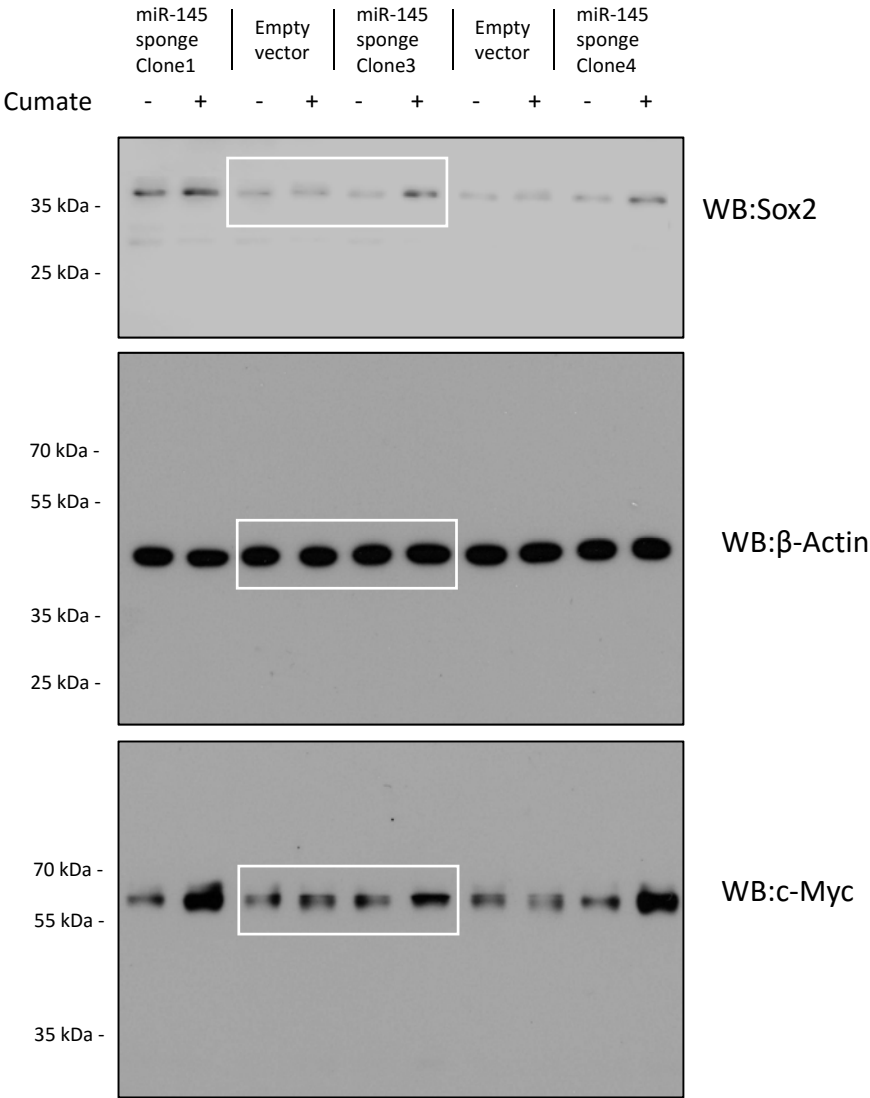

**Supplementary Figure 3:** Expression of c-Myc and Sox2 upon miR-145 sponge induction, as determined by western blot analysis. Full-scans of blots presented in the Figure 2D with molecular weight marker indicated. Corresponding fragments of blot (white rectangles) used in the Figure 2D are indicated.
